# Supplementary material for: First-principles study of square chalcogen bond interactions and its adsorption behavior on silver surface
Source: Royal Society of Chemistry journal article supplement (doi:10.1039/d2cp05825a), 2023-01-01
Supplement: d2cp05825a1.pdf [file d2cp05825a1.pdf]

## First-Principles Study of Square Chalcogen Bond Interactions and its Adsorption Behavior on Silver Surface

Hui Wang<sup>a,\*</sup>, Bin Li<sup>a</sup>, Xiaoting Wang<sup>a</sup>, Fu Yin<sup>a</sup>, Qiaoyu Wei<sup>a</sup>, Xudong Wang<sup>b</sup>,  
Yuxiang Ni<sup>a</sup>, Hongyan Wang<sup>a</sup>

<sup>a</sup>*School of Physical Science and Technology, Southwest Jiaotong University,  
Chengdu 611756, PR China*

<sup>b</sup>*School of Astronomy and Space Science, University of Science and Technology of China,  
Hefei 230026, PR China*

### ■ SUPPORTING INFORMATION

**Fig S1.** The symmetry-adapted perturbation theory (SAPT) calculations were carried out using PSI4 program, SAPT2+/aug-cc-PVDZ method is applied for energy decomposition calculations of dimer complexes, and SAPT2+/Def2-TZVPP method is applied for Te element. Energy units is in kcal/mol.

**Table S1.** Geometric parameters and the interaction energy  $E_{\text{int}}$  of dimers were calculated at MP2/aug-cc-pVTZ theory level. The %VDW denotes the ratio of  $d$  (Ch...N) to the sum of the VDW radii of two interacting atoms.  $d_1$  and  $d_2$  are the Ch...N chalcogen bond distance, respectively. The data in parentheses are the Ch...N distances of silver-surface supported dimer obtained using the PBE-D3 method.

**Table S2.** The optimized dimer structure using PBE-D3 method. %VDW is the ratio of  $d$  (Ch...N) to the sum of the VDW radii of the two interacting atoms. The data in parentheses are the Ch...N distances of silver-surface supported dimer obtained using the PBE-D3 method.

**Table S3.** The single point energy  $E_{\text{int}}$  (kcal/mol) of the dimer complex calculated at DLPNO-CCSD(T) theory level. %VDW denotes the ratio of  $d$  (Ch...N) to the sum of the VDW radii of the two interacting atoms.  $d_1$  and  $d_2$  are the Ch...N chalcogen bond distance, respectively. The data in parentheses are the Ch...N distances of silver-surface supported dimer obtained using the PBE-D3 method.

---

\* Corresponding author.  
E-mail address: wanghui@swjtu.edu.cn (H. Wang)

**Fig S1.** The symmetry-adapted perturbation theory (SAPT) calculations were carried out using PSI4 program, SAPT2+/aug-cc-PVDZ method is applied for energy decomposition calculations of dimer complexes, and SAPT2+/Def2-TZVPP method is applied for Te element. Energy unit is in kcal/mol.

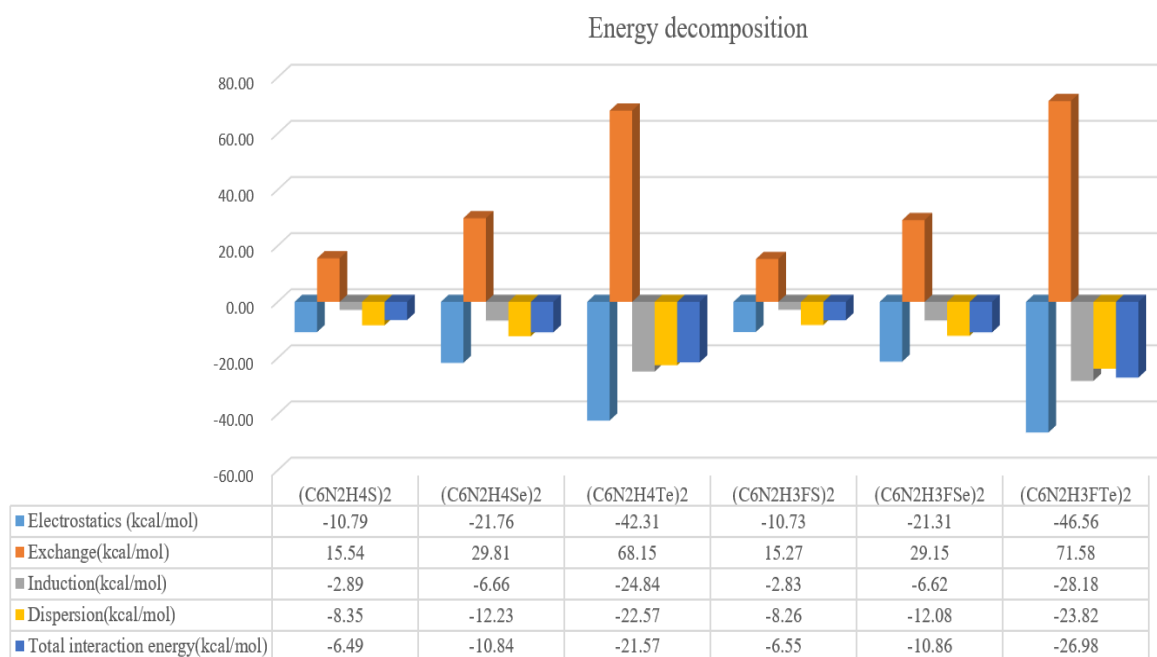

**Table S1.** Geometric parameters and the interaction energy  $E_{\text{int}}$  of dimers were calculated at MP2/aug-cc-pVTZ theory level. The %VDW denotes the ratio of  $d$  (Ch  $\cdots$  N) to the sum of the VDW radii of two interacting atoms.  $d_1$  and  $d_2$  are the Ch  $\cdots$  N chalcogen bond distance, respectively. The data in parentheses are the Ch $\cdots$ N distances of silver-surface supported dimer obtained using the PBE-D3 method.

| Complexes                                      | $d_1$<br>(Å)     | $d_2$<br>(Å)     | %vdW  | $E_{\text{int}}$<br>(kcal/mol) |
|------------------------------------------------|------------------|------------------|-------|--------------------------------|
| $(\text{C}_6\text{N}_2\text{H}_4\text{S})_2$   | 2.969<br>(2.858) | 2.969<br>(3.213) | 0.919 | -6.693                         |
| $(\text{C}_6\text{N}_2\text{H}_4\text{Se})_2$  | 2.841<br>(2.720) | 2.841<br>(2.753) | 0.851 | -7.548                         |
| $(\text{C}_6\text{N}_2\text{H}_3\text{FS})_2$  | 2.970<br>(2.893) | 2.971<br>(3.164) | 0.920 | -5.188                         |
| $(\text{C}_6\text{N}_2\text{H}_3\text{FSe})_2$ | 2.843<br>(2.649) | 2.846<br>(2.841) | 0.852 | -7.592                         |

**Table S2.** The optimized dimer structure using PBE-D3 method. %VDW is the ratio of  $d$  ( $\text{Ch}\cdots\text{N}$ ) to the sum of the VDW radii of the two interacting atoms. The data in parentheses are the  $\text{Ch}\cdots\text{N}$  distances of silver-surface supported dimer obtained using the PBE-D3 method.

| Complexes                                      | $d_1$<br>(Å)     | $d_2$<br>(Å)     | %vdW  | $E_{\text{int}}$<br>(kcal/mol) |
|------------------------------------------------|------------------|------------------|-------|--------------------------------|
| $(\text{C}_6\text{N}_2\text{H}_4\text{S})_2$   | 3.206<br>(2.858) | 3.200<br>(3.213) | 0.992 | -3.851                         |
| $(\text{C}_6\text{N}_2\text{H}_4\text{Se})_2$  | 2.862<br>(2.720) | 2.859<br>(2.753) | 0.856 | -7.818                         |
| $(\text{C}_6\text{N}_2\text{H}_4\text{Te})_2$  | 2.563<br>(2.428) | 2.562<br>(2.454) | 0.704 | -18.379                        |
| $(\text{C}_6\text{N}_2\text{H}_3\text{FS})_2$  | 3.117<br>(2.893) | 3.112<br>(3.164) | 0.964 | -3.989                         |
| $(\text{C}_6\text{N}_2\text{H}_3\text{FSe})_2$ | 2.841<br>(2.649) | 2.838<br>(2.841) | 0.850 | -8.071                         |
| $(\text{C}_6\text{N}_2\text{H}_3\text{FTe})_2$ | 2.532<br>(2.370) | 2.531<br>(2.453) | 0.695 | -19.071                        |

**Table S3.** The single point energy  $E_{\text{int}}$  (kcal/mol) of the dimer complex calculated at DLPNO-CCSD(T) theory level. %VDW denotes the ratio of  $d$  (Ch $\cdots$ N) to the sum of the VDW radii of the two interacting atoms.  $d_1$  and  $d_2$  are the Ch $\cdots$ N chalcogen bond distance, respectively. The data in parentheses are the Ch $\cdots$ N distances of silver-surface supported dimer obtained using the PBE-D3 method.

| Complexes                                      | $d_1$<br>(Å)     | $d_2$<br>(Å)     | %vdW  | $E_{\text{int}}$<br>(kcal/mol) |
|------------------------------------------------|------------------|------------------|-------|--------------------------------|
| $(\text{C}_6\text{N}_2\text{H}_4\text{S})_2$   | 3.077<br>(2.858) | 3.077<br>(3.213) | 0.953 | -4.499                         |
| $(\text{C}_6\text{N}_2\text{H}_4\text{Se})_2$  | 2.845<br>(2.720) | 2.845<br>(2.753) | 0.852 | -7.141                         |
| $(\text{C}_6\text{N}_2\text{H}_4\text{Te})_2$  | 2.564<br>(2.428) | 2.564<br>(2.454) | 0.704 | -14.049                        |
| $(\text{C}_6\text{N}_2\text{H}_3\text{FS})_2$  | 3.074<br>(2.893) | 3.074<br>(3.164) | 0.952 | -4.621                         |
| $(\text{C}_6\text{N}_2\text{H}_3\text{FSe})_2$ | 2.830<br>(2.649) | 2.831<br>(2.841) | 0.847 | -7.379                         |
| $(\text{C}_6\text{N}_2\text{H}_3\text{FTe})_2$ | 2.557<br>(2.370) | 2.557<br>(2.453) | 0.702 | -17.039                        |
